# Supplementary material for: CeZSM-5—a designer's catalyst for selective synthesis of octahydroacridine
Source: Royal Society of Chemistry journal article supplement (doi:10.1039/b409413a), 2004-01-01
Supplement: b409413a.doc [file b409413a.doc]

Molecular modeling studies were performed using Cerius2 which is based on Monte Carlo simulations. The sorption module employed in Cerius2 accounts diffusion into and out of the zeolite pores. Both the sorbate molecules and zeolites were assumed to be rigid, and the Burchart 1.01-Dreiding 2.11 force field was employed in the calculation of Van der Waals energy. The long-range coulombic interactions were calculated using Edwald summation of the electrostatic potentials due to point charges. In summation each configuration is generated by CREATE, DESTROY, TRANSLATE and ROTATE. Each configuration generated is accepted or rejected using Metropolis algorithm based on configurational energy change.
